# Supplementary material
Source: publisher site journal article supplement (https://cdn.jamanetwork.com/ama/content_public/journal/cardiology/938155/hbr190013supp1_prod.pdf)

## Supplementary Online Content

Sandhu A, Bao H, Mingos KE, et al. Use of cardiac resynchronization therapy defibrillator in US hospitals. *JAMA Cardiol*. Published online June 19, 2019.  
doi:10.1001/jamacardio.2019.1755

**eFigure 1.** Attrition plot deriving the study cohort

**eFigure 2.** Rates of guideline concordant/discordant CRT-D use over the study period

This supplementary material has been provided by the authors to give readers additional information about their work.

**eFigure 1.** Attrition plot deriving the study cohort

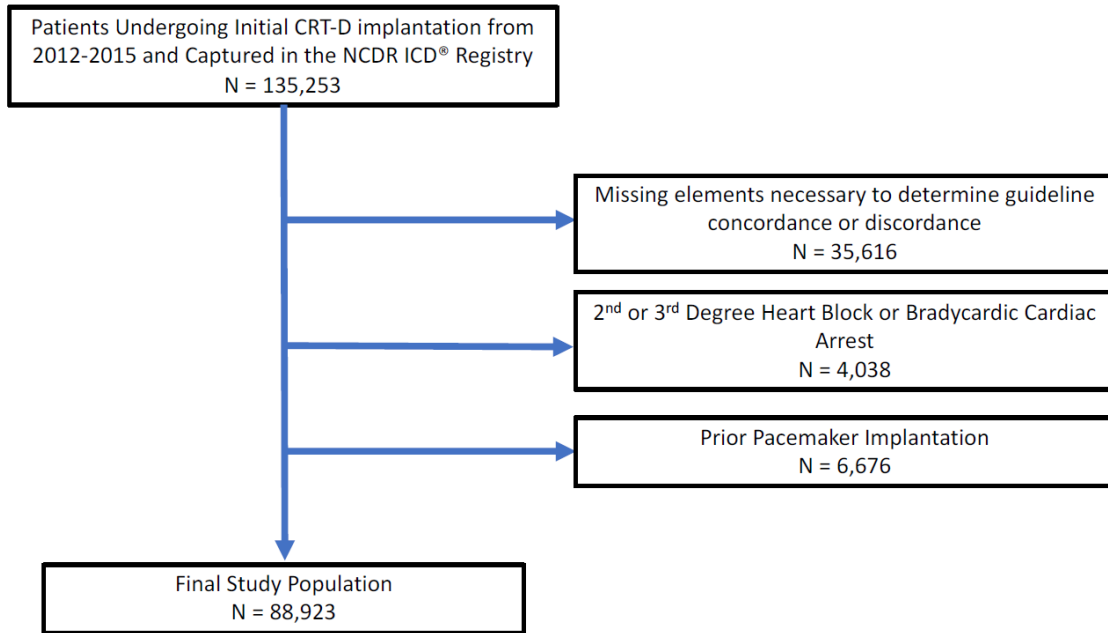

**eFigure 2.** Rates of guideline concordant/discordant CRT-D use over the study period

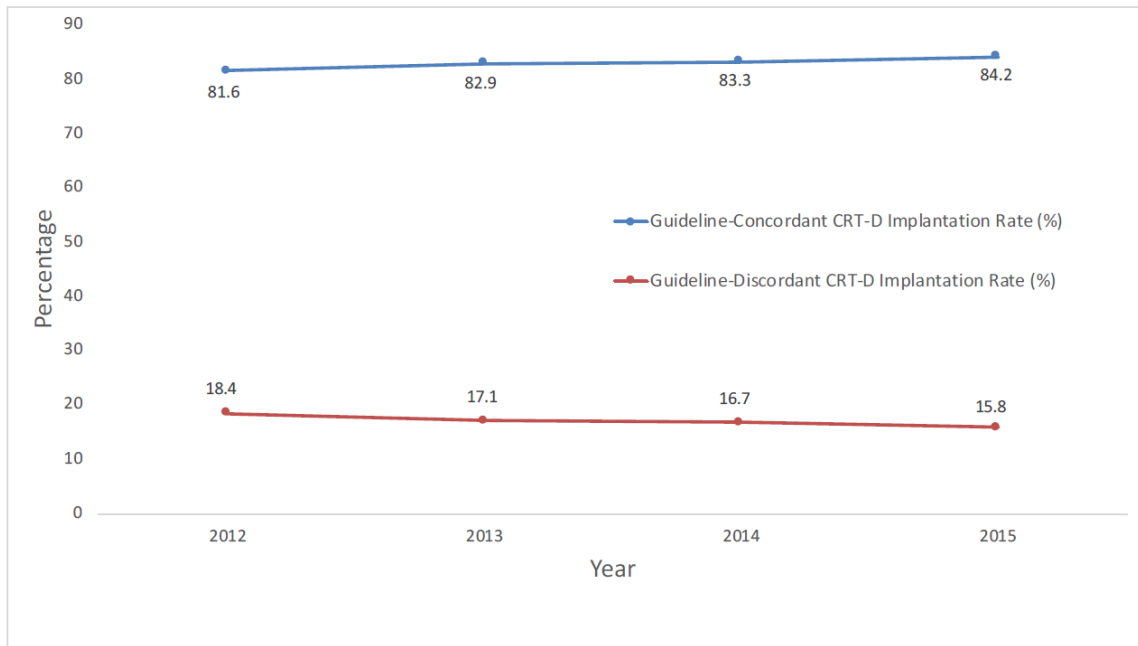

Supplement: Supplementary file 1 [file hbr190013supp1_prod.pdf]
